# Supplementary material for: Effects of a 12-Week Pilates Program on Functional Physical Fitness and Basal Metabolic Rate in Community-Dwelling Middle-Aged Women: A Quasi-Experimental Study
Source: MDPI journal article supplement (doi:10.3390/ijerph192316157), 2022-12-02
Supplement: s1 [file s1]

Supplementary data

Table S1. The programed 12-week Pilates exercise designs

| Exercise/postures    | Duration/Repetitions | Weeks |
|----------------------|----------------------|-------|
| <b>Warming up</b>    | <b>10 minutes</b>    | 1-12  |
| Breathing            | 4 minutes            | 1-12  |
| Pelvic clock         | 8 repetitions        | 1-12  |
| Arm circles          | 8 repetitions        | 1-12  |
| Scapula isolation    | 8 repetitions        | 1-12  |
| Basic bridging       | 8 repetitions        | 1-12  |
| <b>Main Exercise</b> | <b>40 minutes</b>    |       |
| Pelvic curls         | 10 repetitions       | 1-6   |
| Knee fold            | 10 repetitions       | 1-6   |
| Chest lift           | 10 repetitions       | 1-6   |
| Oblique reaches      | 10 repetitions       | 1-6   |
| Knee side to side    | 10 repetitions       | 1-6   |
| The hundred          | 10 repetitions       | 1-12  |
| Side leg lifts       | 10 repetitions       | 1-6   |
| Roll up              | 10 repetitions       | 1-6   |
| Leg circles          | 10 repetitions       | 1-6   |
| Double leg stretch   | 10 repetitions       | 1-6   |
| Single leg stretch   | 10 repetitions       | 7-12  |
| Crisscross           | 10 repetitions       | 7-10  |
| Saw                  | 8 repetitions        | 7-12  |
| Spine twist          | 8 repetitions        | 7-12  |
| Roll like a ball     | 8 repetitions        | 7-12  |
| Roll over            | 8 repetitions        | 7-12  |
| Shoulder bridge      | 8 repetitions        | 7-12  |
| Side kick            | 8 repetitions        | 7-10  |
| Side leg kick        | 8 repetitions        | 7-10  |
| Double leg kick      | 8 repetitions        | 7-10  |
| Swimming             | 8 repetitions        | 7-12  |
| Neck pull            | 8 repetitions        | 10-12 |
| Leg pull down        | 8 repetitions        | 10-12 |
| Side kick kneeling   | 8 repetitions        | 10-12 |
| Hip circle           | 8 repetitions        | 10-12 |
| Bend                 | 8 repetitions        | 10-12 |
| <b>Cooling down</b>  | <b>10 minutes</b>    |       |

|                    |               |      |
|--------------------|---------------|------|
| Upper back stretch | 8 repetitions | 1-12 |
| Cat stretch        | 8 repetitions | 1-12 |
| Spine stretch      | 8 repetitions | 1-12 |
| Rest position      | 4 minutes     | 1-12 |
